# Supplementary material
Source: PubMed Central journal article supplement (PMC2646125)
Supplement: mmc1.pdf [file mmc1.pdf]

Adjuvant external beam radiotherapy in the treatment of endometrial cancer (MRC ASTEC and NCIC CTG EN.5 randomised trials): pooled trial results, systematic review, and meta-analysis

Correspondence to: Ann Marie Swart, MRC Clinical Trials Unit, London NW1 2DA, UK  
ams@ctu.mrc.ac.uk

|                                                                  | No brachytherapy (N=423) | Brachytherapy (N=477) |
|------------------------------------------------------------------|--------------------------|-----------------------|
| <b>Age (years)</b>                                               |                          |                       |
| Median (range)                                                   | 66 (37-88)               | 64 (31-87)            |
| <b>WHO/Eastern Cooperative Oncology Group performance status</b> |                          |                       |
| 0                                                                | 270 (64%)                | 321 (67%)             |
| 1                                                                | 138 (33%)                | 147 (31%)             |
| 2                                                                | 14 (3%)                  | 7 (2%)                |
| 3                                                                | 1 (<1%)                  | 2 (<1%)               |
| <b>Surgery received</b>                                          |                          |                       |
| TAH/BSO                                                          | 308 (73%)                | 327 (69%)             |
| TAH/BSO/lymphadenectomy                                          | 115 (27%)                | 150 (32%)             |
| <b>Histology</b>                                                 |                          |                       |
| Endometrioid                                                     | 365 (88%)                | 374 (79%)             |
| Adenocarcinoma not otherwise specified                           | 5 (1%)                   | 27 (6%)               |
| Clear cell                                                       | 11 (3%)                  | 11 (2%)               |
| Papillary serous                                                 | 10 (2%)                  | 26 (5%)               |
| Squamous                                                         | 5 (1%)                   | 5 (1%)                |
| Mucinous                                                         | 0                        | 1 (<1%)               |
| Mixed epithelial high grade                                      | 11 (3%)                  | 24 (5%)               |
| Mixed epithelial low grade                                       | 3 (1%)                   | 1 (<1%)               |
| Other epithelial, other mixed or no details                      | 3 (1%)                   | 6 (1%)                |
| Mixed epithelial stromal (ineligible)                            | 2 (1%)                   | 0                     |
| Sarcoma (ineligible)                                             | 1 (<1%)                  | 1 (<1%)               |
| Unknown                                                          | 7                        | 1                     |
| <b>Differentiation or grade</b>                                  |                          |                       |
| Well (G1)                                                        | 130 (31%)                | 96 (20%)              |
| Moderate (G2)                                                    | 160 (38%)                | 204 (43%)             |
| Poor (G3)                                                        | 98 (23%)                 | 114 (24%)             |
| Clear cell/serous papillary/mixed epithelial high grade          | 32 (8%)                  | 61 (13%)              |
| Not applicable (sarcoma and mixed epithelial stromal)            | 3                        | 2                     |
| <b>Lymphovascular permeation</b>                                 |                          |                       |
| Yes                                                              | 94 (25%)                 | 106 (25%)             |
| No                                                               | 275 (75%)                | 317 (75%)             |
| Not mentioned in the pathology report                            | 43                       | 51                    |
| Unknown                                                          | 4                        | 0                     |

(Continues in next column)

|                                                                                                      | No brachytherapy (N=423) | Brachytherapy (N=477) |
|------------------------------------------------------------------------------------------------------|--------------------------|-----------------------|
| (Continued from previous column)                                                                     |                          |                       |
| <b>Positive peritoneal status</b>                                                                    |                          |                       |
| Yes                                                                                                  | 16 (4%)                  | 18 (4%)               |
| No                                                                                                   | 366 (96%)                | 452 (96%)             |
| Not done                                                                                             | 41                       | 5                     |
| Unknown                                                                                              | 0                        | 2                     |
| <b>Nodes removed</b>                                                                                 |                          |                       |
| No                                                                                                   | 271 (66%)                | 281 (65%)             |
| Yes (lymphadenectomy or sampling)                                                                    | 141 (34%)                | 153 (35%)             |
| Unknown                                                                                              | 11                       | 43                    |
| <b>Number of nodes removed</b>                                                                       |                          |                       |
| 1-5                                                                                                  | 53                       | 45                    |
| 6-10                                                                                                 | 27                       | 44                    |
| 11-15                                                                                                | 24                       | 22                    |
| >15                                                                                                  | 32                       | 37                    |
| Median (range) number of nodes removed                                                               | 8 (1-40)                 | 9 (1-39)              |
| <b>Nodal involvement (if nodes removed)</b>                                                          |                          |                       |
| No                                                                                                   | 132 (94%)                | 151 (99%)             |
| Yes                                                                                                  | 9 (6%)                   | 2 (1%)                |
| <b>FIGO stage</b>                                                                                    |                          |                       |
| IA (endometrium only)                                                                                | 12 (3%)                  | 14 (3%)               |
| IB (< inner half myometrium)                                                                         | 74 (18%)                 | 80 (17%)              |
| IC (outer half myometrium)                                                                           | 325 (77%)                | 350 (74%)             |
| IIA (endocervical gland invasion)                                                                    | 7 (2%)                   | 30 (6%)               |
| IIB (cervical stromal invasion)                                                                      | 2 (1%)                   | 1 (<1%)               |
| III/IV (spread beyond uterus or cervix)                                                              | 1 (<1%)                  | 0                     |
| Unknown                                                                                              | 2                        | 2                     |
| <b>Risk group1</b>                                                                                   |                          |                       |
| Intermediate risk                                                                                    | 346 (83%)                | 345 (73%)             |
| High risk                                                                                            | 71 (17%)                 | 128 (27%)             |
| Unknown                                                                                              | 6                        | 4                     |
| TAH/BSO=total abdominal hysterectomy with bilateral salpingo-oophorectomy.                           |                          |                       |
| <b>Webtable: Characteristics of patients who did and did not receive brachytherapy in ASTEC/EN.5</b> |                          |                       |
