# Supplementary material
Source: PubMed Central journal article supplement (PMC2646125)
Supplement: mmc2.pdf [file mmc2.pdf]

Adjuvant external beam radiotherapy in the treatment of endometrial cancer (MRC ASTEC and NCIC CTG EN.5 randomised trials): pooled trial results, systematic review, and meta-analysis

Correspondence to:  
Ann Marie Swart, MRC Clinical  
Trials Unit, London NW1 2DA, UK  
ams@ctu.mrc.ac.uk

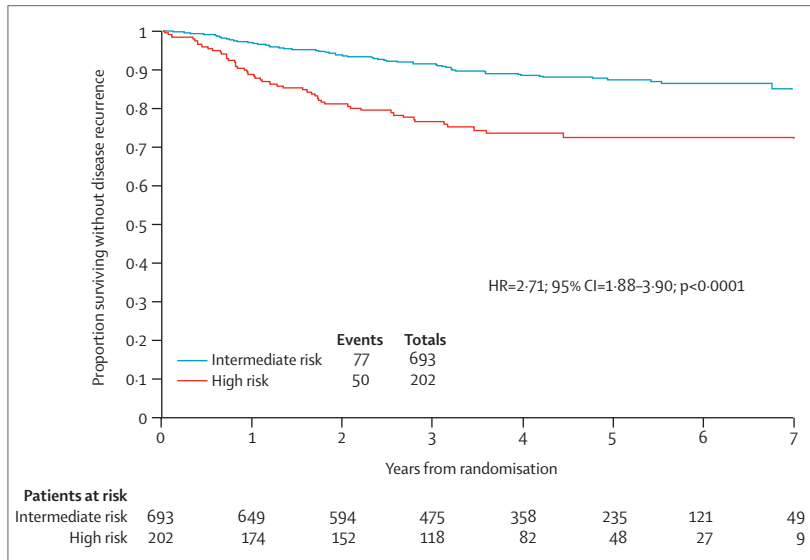

Webfigure: Disease-specific recurrence-free survival by risk group
